# Supplementary material
Source: PubMed Central journal article supplement (PMC6646993)
Supplement: jamainternmed-179-1335-s001.pdf [file jamainternmed-179-1335-s001.pdf]

## Supplementary Online Content

Qian F, Liu G, Hu FB, Bhupathiraju SN, Sun Q. Association between plant-based dietary patterns and risk of type 2 diabetes: a systematic review and meta-analysis. *JAMA Intern Med*. Published online July 22, 2019.

doi:10.1001/jamainternmed.2019.2195

**eTable 1.** Search Terms and Number of Records

**eTable 2.** Inclusion/Exclusion Criteria for Literature Search

**eTable 3.** Food Composition of Plant-Based Diets

**eTable 4.** Assessment of Individual Study Bias

**eFigure 1.** Forest Plot of Prospective Studies Examining the Association Between Plant-Based Dietary Patterns and Risk of Type 2 Diabetes

**eFigure 2.** Changes to the Overall Association Between Plant-Based Dietary Patterns and Risk of Type 2 Diabetes When Removing One Study at a time, Calculated Using Random-Effects Meta-Analysis

**eFigure 3.** Forest Plot of Prospective Studies Examining the Association Between Plant-Based Dietary Patterns and Risk of Type 2 Diabetes, With and Without Adjustments for Body Mass Index (BMI)

**eFigure 4.** Funnel Plot of Prospective Studies Examining the Association Between Plant-Based Dietary Patterns and Risk of Type 2 Diabetes

**eFigure 5.** Fill and Trim Analysis to Account for Potential Publication Bias

This supplementary material has been provided by the authors to give readers additional information about their work.

|                                                                                                                                                                                                                                                                     |
|---------------------------------------------------------------------------------------------------------------------------------------------------------------------------------------------------------------------------------------------------------------------|
| <b>eTable 1.</b> Search Terms and Number of Records                                                                                                                                                                                                                 |
| <b>PubMed</b>                                                                                                                                                                                                                                                       |
| (((((plant-based) OR plant-based diet) OR vegetarian) OR vegan) AND ((diabetes OR type 2 diabetes OR type II diabetes OR non-insulin dependent diabetes OR NIDDM)))                                                                                                 |
| Records found: 552                                                                                                                                                                                                                                                  |
|                                                                                                                                                                                                                                                                     |
| <b>EMBASE</b>                                                                                                                                                                                                                                                       |
| ('plant diet':ti,ab,kw OR 'plant-based diet':ti,ab,kw OR 'vegetarian diet':ti,ab,kw OR 'vegan diet':ti,ab,kw) AND ('diabetes mellitus':ti,ab,kw OR 'non insulin dependent diabetes mellitus':ti,ab,kw OR 'type 2 diabetes':ti,ab,kw OR 'type ii diabetes':ti,ab,kw) |
| Records found: 134                                                                                                                                                                                                                                                  |
|                                                                                                                                                                                                                                                                     |
| <b>Web of Science</b>                                                                                                                                                                                                                                               |
| ((plant-based OR plant-based diet OR vegetarian OR vegan) AND (diabetes OR type 2 diabetes OR type II diabetes OR non-insulin dependent diabetes OR NIDDM))                                                                                                         |
| Records found: 514                                                                                                                                                                                                                                                  |

**eTable 2.** Inclusion/Exclusion Criteria for Literature Search

| Considered items                    | Inclusion                                                                                                                                                                                                                                                                      | Exclusion                                                                                                                                                                                                                          |
|-------------------------------------|--------------------------------------------------------------------------------------------------------------------------------------------------------------------------------------------------------------------------------------------------------------------------------|------------------------------------------------------------------------------------------------------------------------------------------------------------------------------------------------------------------------------------|
| Study type                          | Prospective cohort studies, prospective case-cohort studies, or nested prospective case-control studies                                                                                                                                                                        | Retrospective case-control studies, cross-sectional and ecological studies, literature reviews, commentaries, editorials, letters, case reports, and meeting abstracts                                                             |
| Study population/disease indication | Adults with type II diabetes mellitus or non-insulin dependent diabetes mellitus, through validated self-report, physician diagnosis, or use of diabetes-specific medications                                                                                                  | Primary outcome involves conditions that are not type II diabetes (or non-insulin dependent diabetes) including: type I diabetes, children with type II diabetes, gestational diabetes, prediabetes, or impaired glucose tolerance |
| Exposure                            | Plant-based dietary patterns, defined by emphasis of plant-based foods and de-emphasis or avoidance of animal foods, assessed using validated dietary assessment methods (i.e. the primary dietary method was compared to another method, e.g. food diary or blood biomarkers) | Unclear definitions of dietary exposure or measurements                                                                                                                                                                            |
| Outcomes                            | Multivariate adjusted effect estimate (odds ratio, relative risk, or hazard ratio)                                                                                                                                                                                             | Crude effect estimates only                                                                                                                                                                                                        |
| Publication date range              | Up to September 30 <sup>th</sup> , 2018                                                                                                                                                                                                                                        |                                                                                                                                                                                                                                    |
| Language restriction                | English                                                                                                                                                                                                                                                                        | Not English                                                                                                                                                                                                                        |
| Other                               | Human studies only                                                                                                                                                                                                                                                             | Non-human animal studies, no full text                                                                                                                                                                                             |

| eTable 3. Food Composition of Plant-Based Diets |                                                                              |                                                                                            |                                                               |                |                |                |                |                   |                 |                 |                        |                                                                      |                                          |                      |                    |                                                                                                |                |                                                    |                |                                      |                           |                                                                                              |
|-------------------------------------------------|------------------------------------------------------------------------------|--------------------------------------------------------------------------------------------|---------------------------------------------------------------|----------------|----------------|----------------|----------------|-------------------|-----------------|-----------------|------------------------|----------------------------------------------------------------------|------------------------------------------|----------------------|--------------------|------------------------------------------------------------------------------------------------|----------------|----------------------------------------------------|----------------|--------------------------------------|---------------------------|----------------------------------------------------------------------------------------------|
| Referenc<br>e                                   | Study<br>name<br>(Country)                                                   | Compariso<br>n                                                                             | Plant food groups                                             |                |                |                |                |                   |                 |                 |                        |                                                                      |                                          |                      | Animal food groups |                                                                                                |                |                                                    |                |                                      |                           |                                                                                              |
|                                                 |                                                                              |                                                                                            | Whole<br>grains                                               | Fruits         | Vegetabl<br>es | Nuts           | Legum<br>es    | Vegetab<br>le oil | Tea &<br>Coffee | Fruit<br>juices | Refine<br>d<br>grains  | Potatoes                                                             | Sugar-<br>sweeten<br>ed<br>beverag<br>es | Sweets &<br>desserts | Animal<br>Fat      | Dairy                                                                                          | Eggs           | Fish &<br>seafood                                  | Poultry        | Unprocess<br>ed red<br>meat          | Process<br>ed red<br>meat | Miscellaneo<br>us animal-<br>based foods                                                     |
| Vang<br>2008                                    | Adventist<br>Health<br>Study and<br>Adventist<br>Mortality<br>Study<br>(USA) | Long-term<br>vegetarian<br>vs. long-<br>term<br>nonvegetari<br>an                          | Includ<br>es                                                  | Includ<br>es   | Includes       | Includ<br>es   | Include<br>s   | Includes          | Includ<br>es    | Includ<br>es    | Includ<br>es           | Includes                                                             | Includes                                 | Includes             | Include<br>s       | Include<br>s                                                                                   | Include<br>s   | Exclud<br>es                                       | Exclud<br>es   | Excludes                             | Exclude<br>s              | Includes, if<br>not<br>manufactur<br>ed using red<br>meat,<br>poultry or<br>fish<br>products |
| Tonstad<br>2013                                 | Adventist<br>Health<br>Study-2<br>(USA)                                      | Vegan vs.<br>nonvegetari<br>an                                                             | Includ<br>es                                                  | Includ<br>es   | Includes       | Includ<br>es   | Include<br>s   | Includes          | Includ<br>es    | Includ<br>es    | Includ<br>es           | Includes                                                             | Includes                                 | Includes             | Exclud<br>es       | Exclud<br>es                                                                                   | Exclud<br>es   | Exclud<br>es                                       | Exclud<br>es   | Excludes                             | Exclude<br>s              | Excludes                                                                                     |
| Kolover<br>ou 2016                              | ATTICA<br>Cohort<br>Study<br>(Greece)                                        | Factor<br>coefficient<br>for plant-<br>based diet<br>(Factor 2)                            | Bread,<br>rusk,<br>pasta:<br>0.554<br>Cereal<br>s: -<br>0.105 | 0.550          | 0.655          | 0.034          | 0.692          | N/A               | N/A             | N/A             | See<br>whole<br>grains | Potatoes,<br>fried:<br>-0.033<br>Potatoes<br>boiled/bak<br>ed: 0.329 | N/A                                      | 0.156                | N/A                | Dairy<br>(milk,<br>yogurt)<br>: 0.106<br>Feta<br>cheese:<br>0.126<br>Hard<br>cheese:<br>-0.010 | N/A            | Fish,<br>small:<br>0.156<br>Fish,<br>big:<br>0.022 | 0.144          | Beef: -<br>0.022<br>Pork: -<br>0.059 | -0.106                    | N/A                                                                                          |
| Satija<br>2016                                  | Nurses'<br>Health<br>Study<br>(USA)                                          | Extreme<br>deciles of<br>overall<br>plant-based<br>diet index,<br>mean<br>servings/da<br>y | 1.5 vs.<br>0.8                                                | 1.8 vs.<br>0.9 | 3.7 vs.<br>2.6 | 0.4 vs.<br>0.2 | 0.5 vs.<br>0.3 | 0.8 vs.<br>0.4    | 3.5 vs.<br>2.6  | 0.9 vs.<br>0.5  | 1.7 vs.<br>1.3         | 0.5 vs. 0.4                                                          | 0.3 vs.<br>0.2                           | 1.3 vs. 0.9          | 0.1 vs.<br>0.6     | 1.3 vs.<br>2.3                                                                                 | 0.2 vs.<br>0.5 | 0.3 vs.<br>0.4                                     | 0.3 vs.<br>0.3 | 0.5 vs. 0.7                          | 0.2 vs.<br>0.4            | 0.3 vs. 0.5                                                                                  |
| Satija<br>2016                                  | Nurses'<br>Health<br>Study II<br>(USA)                                       | Extreme<br>deciles of<br>overall<br>plant-based<br>diet index,<br>mean<br>servings/da<br>y | 2.0 vs.<br>1.1                                                | 1.7 vs.<br>0.9 | 4.2 vs.<br>2.6 | 0.4 vs.<br>0.2 | 0.6 vs.<br>0.3 | 0.4 vs.<br>0.2    | 2.7 vs.<br>1.8  | 1.0 vs.<br>0.5  | 1.7 vs.<br>1.4         | 0.6 vs. 0.5                                                          | 0.4 vs.<br>0.5                           | 1.4 vs. 1.1          | 0.0 vs.<br>0.3     | 1.7 vs.<br>2.8                                                                                 | 0.1 vs.<br>0.3 | 0.2 vs.<br>0.3                                     | 0.3 vs.<br>0.4 | 0.3 vs. 0.4                          | 0.1 vs.<br>0.1            | 0.1 vs. 0.4                                                                                  |
| Satija<br>2016                                  | Health<br>Professiona<br>ls Follow-<br>up Study<br>(USA)                     | Extreme<br>deciles of<br>overall<br>plant-based<br>diet index,<br>mean                     | 2.2 vs.<br>1.1                                                | 2.2 vs.<br>1.1 | 4.2 vs.<br>2.5 | 0.7 vs.<br>0.3 | 0.6 vs.<br>0.3 | 0.4 vs.<br>0.2    | 2.6 vs.<br>2.1  | 1.1 vs.<br>0.6  | 1.7 vs.<br>1.3         | 0.6 vs. 0.5                                                          | 0.4 vs.<br>0.3                           | 1.6 vs. 1.2          | 0.0 vs.<br>0.5     | 1.4 vs.<br>2.5                                                                                 | 0.2 vs.<br>0.5 | 0.4 vs.<br>0.4                                     | 0.9 vs.<br>0.9 | 0.5 vs. 0.7                          | 0.3 vs.<br>0.6            | 0.2 vs. 0.7                                                                                  |

|           |                                              |                                                                |                |                 |                 |               |               |               |                                              |               |               |                |               |                                                                 |             |                                                                                         |               |               |               |               |               |                                                                        |
|-----------|----------------------------------------------|----------------------------------------------------------------|----------------|-----------------|-----------------|---------------|---------------|---------------|----------------------------------------------|---------------|---------------|----------------|---------------|-----------------------------------------------------------------|-------------|-----------------------------------------------------------------------------------------|---------------|---------------|---------------|---------------|---------------|------------------------------------------------------------------------|
|           |                                              | servings/day                                                   |                |                 |                 |               |               |               |                                              |               |               |                |               |                                                                 |             |                                                                                         |               |               |               |               |               |                                                                        |
| Chen 2018 | Singapore Chinese Health Study (Singapore)   | Extreme quintiles of plant-based diet index, mean servings/day | 0.78 vs. 0.10  | 1.91 vs. 0.69   | 2.01 vs. 1.05   | 0.32 vs. 0.04 | 0.71 vs. 0.29 | 0.89 vs. 0.24 | Tea: 0.76 vs. 0.32<br>Coffee : 1.57 vs. 1.18 | 0.17 vs. 0.02 | 2.97 vs. 2.28 | N/A            | 0.13 vs. 0.04 | N/A                                                             | N/A         | 0.27 vs. 0.34                                                                           | 0.23 vs. 0.30 | 0.62 vs. 0.62 | 0.23 vs. 0.23 | 0.31 vs. 0.32 |               | N/A                                                                    |
| Chen 2018 | Rotterdam Study I, II, and III (Netherlands) | Extreme quintiles of plant-based diet index, median grams/day  | 135.0 vs. 88.3 | 258.5 vs. 168.0 | 241.3 vs. 181.6 | 9.0 vs. 13.5  | 13.5 vs. 0.0  | 27.7 vs. 12.0 | 900.0 vs. 705.4                              | N/A           | 61.2 vs. 37.7 | 126.0 vs. 83.6 | 59.8 vs. 15.0 | Sweets: 71.3 vs. 50.3<br>Desserts/day with sugars: 6.4 vs. 21.4 | 0.0 vs. 0.7 | Low-fat yogurt: 32.1 vs. 82.3<br>Low-fat milk: 48.0 vs. 111.0<br>Cheese : 29.9 vs. 32.9 | 10.7 vs. 14.3 | 11.0 vs. 21.4 | N/A           | 7.6 vs. 14.3  | 80.0 vs. 93.2 | N/A                                                                    |
| Chiu 2018 | Tzu Chi Health Study (Taiwan)                | Vegetarian diet, full-time                                     | Includes       | Includes        | Includes        | Includes      | Includes      | Includes      | Includes                                     | Includes      | Includes      | Includes       | Includes      | Includes                                                        | Excludes    | Includes                                                                                | Includes      | Excludes      | Excludes      | Excludes      | Excludes      | Includes, if not manufactured using red meat, poultry or fish products |

eTable 4. Assessment of Individual Study Bias

| Study           | Criteria                                                                                                                                                                                                                                   | Yes | No | Other (cannot determine, not reported, not applicable) |
|-----------------|--------------------------------------------------------------------------------------------------------------------------------------------------------------------------------------------------------------------------------------------|-----|----|--------------------------------------------------------|
| Vang 2008       | 1. Was the research question or objective in this paper clearly stated?                                                                                                                                                                    | X   |    |                                                        |
|                 | 2. Was the study population clearly specified and defined?                                                                                                                                                                                 | X   |    |                                                        |
|                 | 3. Was the participation rate of eligible persons at least 50% ?                                                                                                                                                                           |     | X  |                                                        |
|                 | 4. Were all the subjects selected or recruited from the same or similar populations (including the same time period)? Were inclusion and exclusion criteria for being in the study prespecified and applied uniformly to all participants? | X   |    |                                                        |
|                 | 5. Was a sample size justification, power description, or variance and effect estimates provided?                                                                                                                                          | X   |    |                                                        |
|                 | 6. For the analyses in this paper, were the exposure(s) of interest measured prior to the outcome(s) being measured?                                                                                                                       | X   |    |                                                        |
|                 | 7. Was the timeframe sufficient so that one could reasonably expect to see an association between exposure and outcome if it existed?                                                                                                      | X   |    |                                                        |
|                 | 8. For exposures that can vary in amount or level, did the study examine different levels of the exposure as related to the outcome (e.g., categories of exposure, or exposure measured as continuous variable)?                           | X   |    |                                                        |
|                 | 9. Were the exposure measures (independent variables) clearly defined, valid, reliable, and implemented consistently across all study participants?                                                                                        | X   |    |                                                        |
|                 | 10. Was the exposure(s) assessed more than once over time?                                                                                                                                                                                 |     | X  |                                                        |
|                 | 11. Were the outcome measures (dependent variables) clearly defined, valid, reliable, and implemented consistently across all study participants?                                                                                          |     | X  |                                                        |
|                 | 12. Were the outcome assessors blinded to the exposure status of participants?                                                                                                                                                             | X   |    |                                                        |
|                 | 13. Was loss to follow-up after baseline 20% or less?                                                                                                                                                                                      |     |    | X                                                      |
|                 | 14. Were key potential confounding variables measured and adjusted statistically for their impact on the relationship between exposure(s) and outcome(s)?                                                                                  |     | X  |                                                        |
|                 | Total                                                                                                                                                                                                                                      | 9   |    |                                                        |
| Tonstad 2013    | 1. Was the research question or objective in this paper clearly stated?                                                                                                                                                                    | X   |    |                                                        |
|                 | 2. Was the study population clearly specified and defined?                                                                                                                                                                                 | X   |    |                                                        |
|                 | 3. Was the participation rate of eligible persons at least 50% ?                                                                                                                                                                           | X   |    |                                                        |
|                 | 4. Were all the subjects selected or recruited from the same or similar populations (including the same time period)? Were inclusion and exclusion criteria for being in the study prespecified and applied uniformly to all participants? | X   |    |                                                        |
|                 | 5. Was a sample size justification, power description, or variance and effect estimates provided?                                                                                                                                          |     | X  |                                                        |
|                 | 6. For the analyses in this paper, were the exposure(s) of interest measured prior to the outcome(s) being measured?                                                                                                                       | X   |    |                                                        |
|                 | 7. Was the timeframe sufficient so that one could reasonably expect to see an association between exposure and outcome if it existed?                                                                                                      |     | X  |                                                        |
|                 | 8. For exposures that can vary in amount or level, did the study examine different levels of the exposure as related to the outcome (e.g., categories of exposure, or exposure measured as continuous variable)?                           | X   |    |                                                        |
|                 | 9. Were the exposure measures (independent variables) clearly defined, valid, reliable, and implemented consistently across all study participants?                                                                                        | X   |    |                                                        |
|                 | 10. Was the exposure(s) assessed more than once over time?                                                                                                                                                                                 |     | X  |                                                        |
|                 | 11. Were the outcome measures (dependent variables) clearly defined, valid, reliable, and implemented consistently across all study participants?                                                                                          | X   |    |                                                        |
|                 | 12. Were the outcome assessors blinded to the exposure status of participants?                                                                                                                                                             | X   |    |                                                        |
|                 | 13. Was loss to follow-up after baseline 20% or less?                                                                                                                                                                                      |     |    | X                                                      |
|                 | 14. Were key potential confounding variables measured and adjusted statistically for their impact on the relationship between exposure(s) and outcome(s)?                                                                                  | X   |    |                                                        |
|                 | Total                                                                                                                                                                                                                                      | 10  |    |                                                        |
| Kolooverou 2016 | 1. Was the research question or objective in this paper clearly stated?                                                                                                                                                                    | X   |    |                                                        |
|                 | 2. Was the study population clearly specified and defined?                                                                                                                                                                                 | X   |    |                                                        |

|                     |                                                                                                                                                                                                                                            |    |   |  |
|---------------------|--------------------------------------------------------------------------------------------------------------------------------------------------------------------------------------------------------------------------------------------|----|---|--|
|                     | 3. Was the participation rate of eligible persons at least 50% ?                                                                                                                                                                           | X  |   |  |
|                     | 4. Were all the subjects selected or recruited from the same or similar populations (including the same time period)? Were inclusion and exclusion criteria for being in the study prespecified and applied uniformly to all participants? | X  |   |  |
|                     | 5. Was a sample size justification, power description, or variance and effect estimates provided?                                                                                                                                          | X  |   |  |
|                     | 6. For the analyses in this paper, were the exposure(s) of interest measured prior to the outcome(s) being measured?                                                                                                                       | X  |   |  |
|                     | 7. Was the timeframe sufficient so that one could reasonably expect to see an association between exposure and outcome if it existed?                                                                                                      | X  |   |  |
|                     | 8. For exposures that can vary in amount or level, did the study examine different levels of the exposure as related to the outcome (e.g., categories of exposure, or exposure measured as continuous variable)?                           | X  |   |  |
|                     | 9. Were the exposure measures (independent variables) clearly defined, valid, reliable, and implemented consistently across all study participants?                                                                                        | X  |   |  |
|                     | 10. Was the exposure(s) assessed more than once over time?                                                                                                                                                                                 |    | X |  |
|                     | 11. Were the outcome measures (dependent variables) clearly defined, valid, reliable, and implemented consistently across all study participants?                                                                                          | X  |   |  |
|                     | 12. Were the outcome assessors blinded to the exposure status of participants?                                                                                                                                                             | X  |   |  |
|                     | 13. Was loss to follow-up after baseline 20% or less?                                                                                                                                                                                      | X  |   |  |
|                     | 14. Were key potential confounding variables measured and adjusted statistically for their impact on the relationship between exposure(s) and outcome(s)?                                                                                  | X  |   |  |
|                     | Total                                                                                                                                                                                                                                      | 13 |   |  |
|                     |                                                                                                                                                                                                                                            |    |   |  |
| Satija 2016 (NHS)   | 1. Was the research question or objective in this paper clearly stated?                                                                                                                                                                    | X  |   |  |
|                     | 2. Was the study population clearly specified and defined?                                                                                                                                                                                 | X  |   |  |
|                     | 3. Was the participation rate of eligible persons at least 50% ?                                                                                                                                                                           | X  |   |  |
|                     | 4. Were all the subjects selected or recruited from the same or similar populations (including the same time period)? Were inclusion and exclusion criteria for being in the study prespecified and applied uniformly to all participants? | X  |   |  |
|                     | 5. Was a sample size justification, power description, or variance and effect estimates provided?                                                                                                                                          |    | X |  |
|                     | 6. For the analyses in this paper, were the exposure(s) of interest measured prior to the outcome(s) being measured?                                                                                                                       | X  |   |  |
|                     | 7. Was the timeframe sufficient so that one could reasonably expect to see an association between exposure and outcome if it existed?                                                                                                      | X  |   |  |
|                     | 8. For exposures that can vary in amount or level, did the study examine different levels of the exposure as related to the outcome (e.g., categories of exposure, or exposure measured as continuous variable)?                           | X  |   |  |
|                     | 9. Were the exposure measures (independent variables) clearly defined, valid, reliable, and implemented consistently across all study participants?                                                                                        | X  |   |  |
|                     | 10. Was the exposure(s) assessed more than once over time?                                                                                                                                                                                 | X  |   |  |
|                     | 11. Were the outcome measures (dependent variables) clearly defined, valid, reliable, and implemented consistently across all study participants?                                                                                          | X  |   |  |
|                     | 12. Were the outcome assessors blinded to the exposure status of participants?                                                                                                                                                             | X  |   |  |
|                     | 13. Was loss to follow-up after baseline 20% or less?                                                                                                                                                                                      | X  |   |  |
|                     | 14. Were key potential confounding variables measured and adjusted statistically for their impact on the relationship between exposure(s) and outcome(s)?                                                                                  | X  |   |  |
|                     | Total                                                                                                                                                                                                                                      | 13 |   |  |
|                     |                                                                                                                                                                                                                                            |    |   |  |
| Satija 2016 (NHSII) | 1. Was the research question or objective in this paper clearly stated?                                                                                                                                                                    | X  |   |  |
|                     | 2. Was the study population clearly specified and defined?                                                                                                                                                                                 | X  |   |  |
|                     | 3. Was the participation rate of eligible persons at least 50% ?                                                                                                                                                                           | X  |   |  |
|                     | 4. Were all the subjects selected or recruited from the same or similar populations (including the same time period)? Were inclusion and exclusion criteria for being in the study prespecified and applied uniformly to all participants? | X  |   |  |
|                     | 5. Was a sample size justification, power description, or variance and effect estimates provided?                                                                                                                                          |    | X |  |
|                     | 6. For the analyses in this paper, were the exposure(s) of interest measured prior to the outcome(s) being measured?                                                                                                                       | X  |   |  |
|                     | 7. Was the timeframe sufficient so that one could reasonably expect to see an association between exposure and outcome if it existed?                                                                                                      | X  |   |  |

|                    |                                                                                                                                                                                                                                            |    |   |  |
|--------------------|--------------------------------------------------------------------------------------------------------------------------------------------------------------------------------------------------------------------------------------------|----|---|--|
|                    | 8. For exposures that can vary in amount or level, did the study examine different levels of the exposure as related to the outcome (e.g., categories of exposure, or exposure measured as continuous variable)?                           | X  |   |  |
|                    | 9. Were the exposure measures (independent variables) clearly defined, valid, reliable, and implemented consistently across all study participants?                                                                                        | X  |   |  |
|                    | 10. Was the exposure(s) assessed more than once over time?                                                                                                                                                                                 | X  |   |  |
|                    | 11. Were the outcome measures (dependent variables) clearly defined, valid, reliable, and implemented consistently across all study participants?                                                                                          | X  |   |  |
|                    | 12. Were the outcome assessors blinded to the exposure status of participants?                                                                                                                                                             | X  |   |  |
|                    | 13. Was loss to follow-up after baseline 20% or less?                                                                                                                                                                                      | X  |   |  |
|                    | 14. Were key potential confounding variables measured and adjusted statistically for their impact on the relationship between exposure(s) and outcome(s)?                                                                                  | X  |   |  |
|                    | Total                                                                                                                                                                                                                                      | 13 |   |  |
|                    |                                                                                                                                                                                                                                            |    |   |  |
| Satija 2016 (HPFS) | 1. Was the research question or objective in this paper clearly stated?                                                                                                                                                                    | X  |   |  |
|                    | 2. Was the study population clearly specified and defined?                                                                                                                                                                                 | X  |   |  |
|                    | 3. Was the participation rate of eligible persons at least 50%?                                                                                                                                                                            | X  |   |  |
|                    | 4. Were all the subjects selected or recruited from the same or similar populations (including the same time period)? Were inclusion and exclusion criteria for being in the study prespecified and applied uniformly to all participants? | X  |   |  |
|                    | 5. Was a sample size justification, power description, or variance and effect estimates provided?                                                                                                                                          |    | X |  |
|                    | 6. For the analyses in this paper, were the exposure(s) of interest measured prior to the outcome(s) being measured?                                                                                                                       | X  |   |  |
|                    | 7. Was the timeframe sufficient so that one could reasonably expect to see an association between exposure and outcome if it existed?                                                                                                      | X  |   |  |
|                    | 8. For exposures that can vary in amount or level, did the study examine different levels of the exposure as related to the outcome (e.g., categories of exposure, or exposure measured as continuous variable)?                           | X  |   |  |
|                    | 9. Were the exposure measures (independent variables) clearly defined, valid, reliable, and implemented consistently across all study participants?                                                                                        | X  |   |  |
|                    | 10. Was the exposure(s) assessed more than once over time?                                                                                                                                                                                 | X  |   |  |
|                    | 11. Were the outcome measures (dependent variables) clearly defined, valid, reliable, and implemented consistently across all study participants?                                                                                          | X  |   |  |
|                    | 12. Were the outcome assessors blinded to the exposure status of participants?                                                                                                                                                             | X  |   |  |
|                    | 13. Was loss to follow-up after baseline 20% or less?                                                                                                                                                                                      | X  |   |  |
|                    | 14. Were key potential confounding variables measured and adjusted statistically for their impact on the relationship between exposure(s) and outcome(s)?                                                                                  | X  |   |  |
|                    | Total                                                                                                                                                                                                                                      | 13 |   |  |
|                    |                                                                                                                                                                                                                                            |    |   |  |
| Chen 2018 (SCHS)   | 1. Was the research question or objective in this paper clearly stated?                                                                                                                                                                    | X  |   |  |
|                    | 2. Was the study population clearly specified and defined?                                                                                                                                                                                 | X  |   |  |
|                    | 3. Was the participation rate of eligible persons at least 50%?                                                                                                                                                                            | X  |   |  |
|                    | 4. Were all the subjects selected or recruited from the same or similar populations (including the same time period)? Were inclusion and exclusion criteria for being in the study prespecified and applied uniformly to all participants? |    |   |  |
|                    | 5. Was a sample size justification, power description, or variance and effect estimates provided?                                                                                                                                          |    | X |  |
|                    | 6. For the analyses in this paper, were the exposure(s) of interest measured prior to the outcome(s) being measured?                                                                                                                       | X  |   |  |
|                    | 7. Was the timeframe sufficient so that one could reasonably expect to see an association between exposure and outcome if it existed?                                                                                                      | X  |   |  |
|                    | 8. For exposures that can vary in amount or level, did the study examine different levels of the exposure as related to the outcome (e.g., categories of exposure, or exposure measured as continuous variable)?                           | X  |   |  |
|                    | 9. Were the exposure measures (independent variables) clearly defined, valid, reliable, and implemented consistently across all study participants?                                                                                        |    |   |  |
|                    | 10. Was the exposure(s) assessed more than once over time?                                                                                                                                                                                 |    | X |  |
|                    | 11. Were the outcome measures (dependent variables) clearly defined, valid, reliable, and implemented consistently across all study participants?                                                                                          | X  |   |  |
|                    | 12. Were the outcome assessors blinded to the exposure status of participants?                                                                                                                                                             | X  |   |  |
|                    | 13. Was loss to follow-up after baseline 20% or less?                                                                                                                                                                                      | X  |   |  |

|                       |                                                                                                                                                                                                                                            |    |   |  |
|-----------------------|--------------------------------------------------------------------------------------------------------------------------------------------------------------------------------------------------------------------------------------------|----|---|--|
|                       | 14. Were key potential confounding variables measured and adjusted statistically for their impact on the relationship between exposure(s) and outcome(s)?                                                                                  | X  |   |  |
|                       | Total                                                                                                                                                                                                                                      | 12 |   |  |
|                       |                                                                                                                                                                                                                                            |    |   |  |
| Chen 2018 (Rotterdam) | 1. Was the research question or objective in this paper clearly stated?                                                                                                                                                                    | X  |   |  |
|                       | 2. Was the study population clearly specified and defined?                                                                                                                                                                                 | X  |   |  |
|                       | 3. Was the participation rate of eligible persons at least 50%?                                                                                                                                                                            | X  |   |  |
|                       | 4. Were all the subjects selected or recruited from the same or similar populations (including the same time period)? Were inclusion and exclusion criteria for being in the study prespecified and applied uniformly to all participants? | X  |   |  |
|                       | 5. Was a sample size justification, power description, or variance and effect estimates provided?                                                                                                                                          |    | X |  |
|                       | 6. For the analyses in this paper, were the exposure(s) of interest measured prior to the outcome(s) being measured?                                                                                                                       | X  |   |  |
|                       | 7. Was the timeframe sufficient so that one could reasonably expect to see an association between exposure and outcome if it existed?                                                                                                      | X  |   |  |
|                       | 8. For exposures that can vary in amount or level, did the study examine different levels of the exposure as related to the outcome (e.g., categories of exposure, or exposure measured as continuous variable)?                           | X  |   |  |
|                       | 9. Were the exposure measures (independent variables) clearly defined, valid, reliable, and implemented consistently across all study participants?                                                                                        | X  |   |  |
|                       | 10. Was the exposure(s) assessed more than once over time?                                                                                                                                                                                 |    | X |  |
|                       | 11. Were the outcome measures (dependent variables) clearly defined, valid, reliable, and implemented consistently across all study participants?                                                                                          | X  |   |  |
|                       | 12. Were the outcome assessors blinded to the exposure status of participants?                                                                                                                                                             | X  |   |  |
|                       | 13. Was loss to follow-up after baseline 20% or less?                                                                                                                                                                                      | X  |   |  |
|                       | 14. Were key potential confounding variables measured and adjusted statistically for their impact on the relationship between exposure(s) and outcome(s)?                                                                                  | X  |   |  |
|                       | Total                                                                                                                                                                                                                                      | 12 |   |  |
|                       |                                                                                                                                                                                                                                            |    |   |  |
| Chiu 2018             | 1. Was the research question or objective in this paper clearly stated?                                                                                                                                                                    | X  |   |  |
|                       | 2. Was the study population clearly specified and defined?                                                                                                                                                                                 | X  |   |  |
|                       | 3. Was the participation rate of eligible persons at least 50%?                                                                                                                                                                            | X  |   |  |
|                       | 4. Were all the subjects selected or recruited from the same or similar populations (including the same time period)? Were inclusion and exclusion criteria for being in the study prespecified and applied uniformly to all participants? | X  |   |  |
|                       | 5. Was a sample size justification, power description, or variance and effect estimates provided?                                                                                                                                          |    | X |  |
|                       | 6. For the analyses in this paper, were the exposure(s) of interest measured prior to the outcome(s) being measured?                                                                                                                       | X  |   |  |
|                       | 7. Was the timeframe sufficient so that one could reasonably expect to see an association between exposure and outcome if it existed?                                                                                                      | X  |   |  |
|                       | 8. For exposures that can vary in amount or level, did the study examine different levels of the exposure as related to the outcome (e.g., categories of exposure, or exposure measured as continuous variable)?                           | X  |   |  |
|                       | 9. Were the exposure measures (independent variables) clearly defined, valid, reliable, and implemented consistently across all study participants?                                                                                        |    | X |  |
|                       | 10. Was the exposure(s) assessed more than once over time?                                                                                                                                                                                 | X  |   |  |
|                       | 11. Were the outcome measures (dependent variables) clearly defined, valid, reliable, and implemented consistently across all study participants?                                                                                          | X  |   |  |
|                       | 12. Were the outcome assessors blinded to the exposure status of participants?                                                                                                                                                             | X  |   |  |
|                       | 13. Was loss to follow-up after baseline 20% or less?                                                                                                                                                                                      | X  |   |  |
|                       | 14. Were key potential confounding variables measured and adjusted statistically for their impact on the relationship between exposure(s) and outcome(s)?                                                                                  | X  |   |  |
|                       | Total                                                                                                                                                                                                                                      | 12 |   |  |

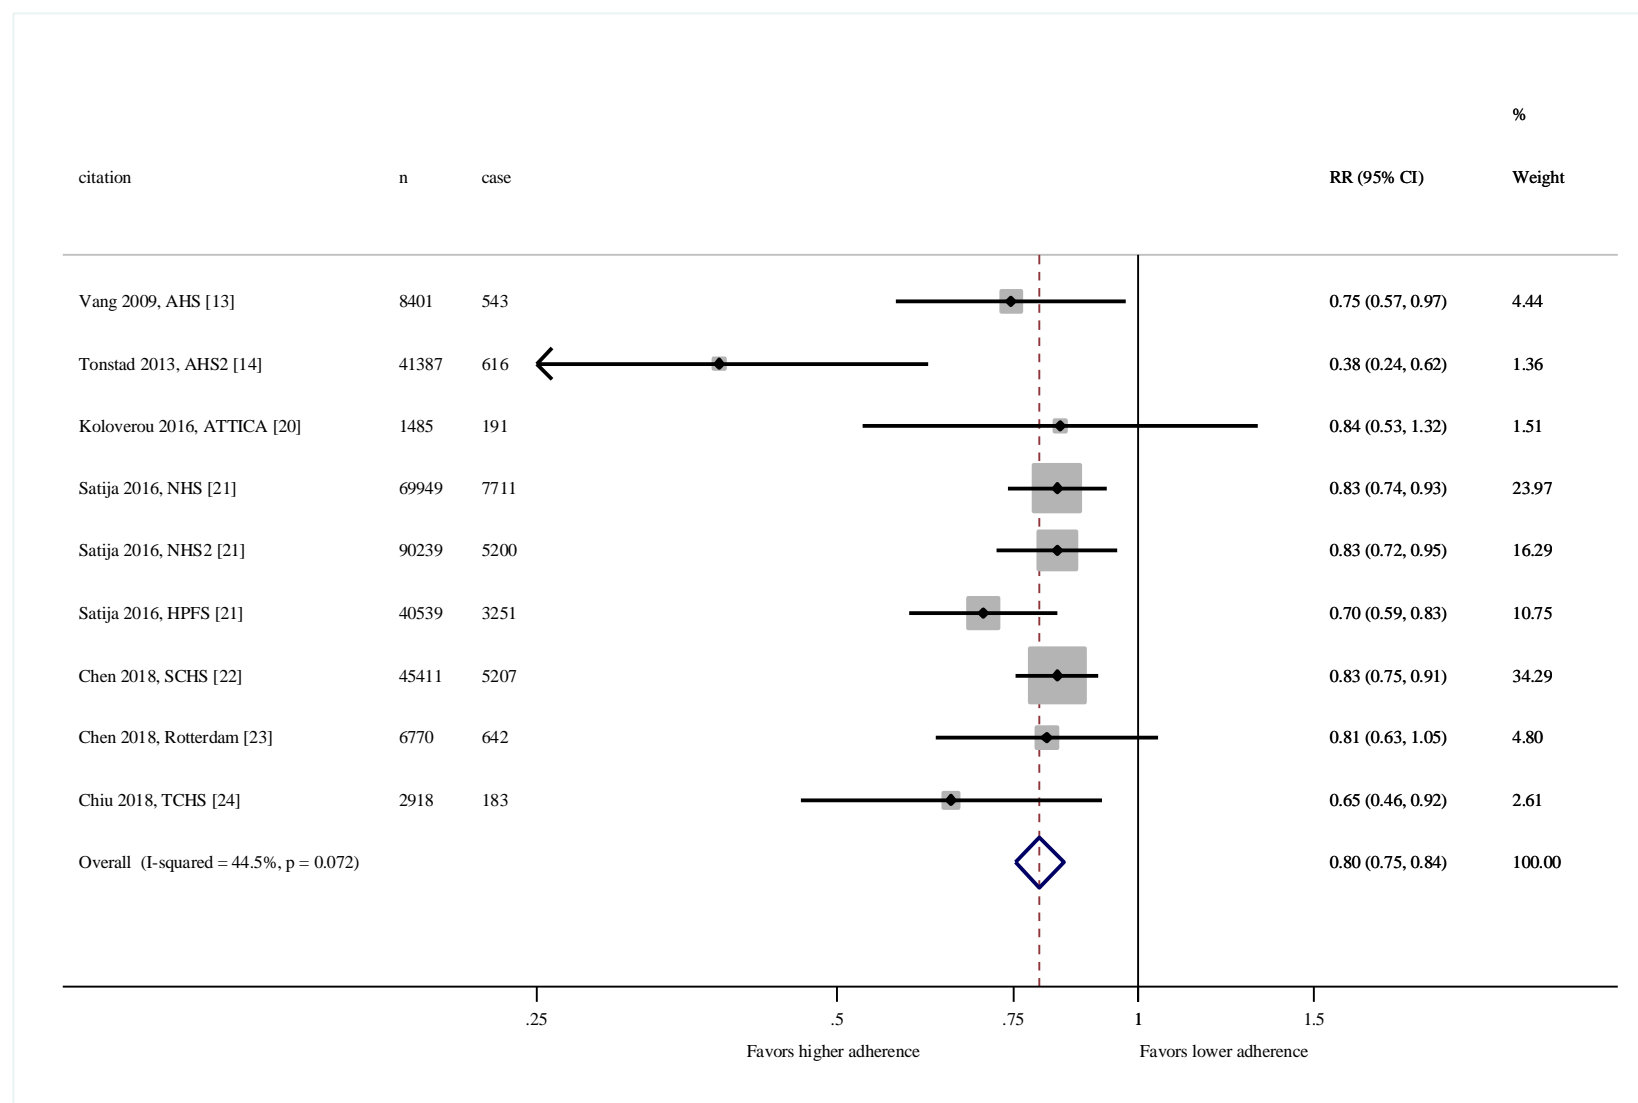

**eFigure 1.** Forest Plot of Prospective Studies Examining the Association Between Plant-Based Dietary Patterns and Risk of Type 2 Diabetes

Pooled estimate was calculated using inverse-variance fixed-effects meta-analysis.

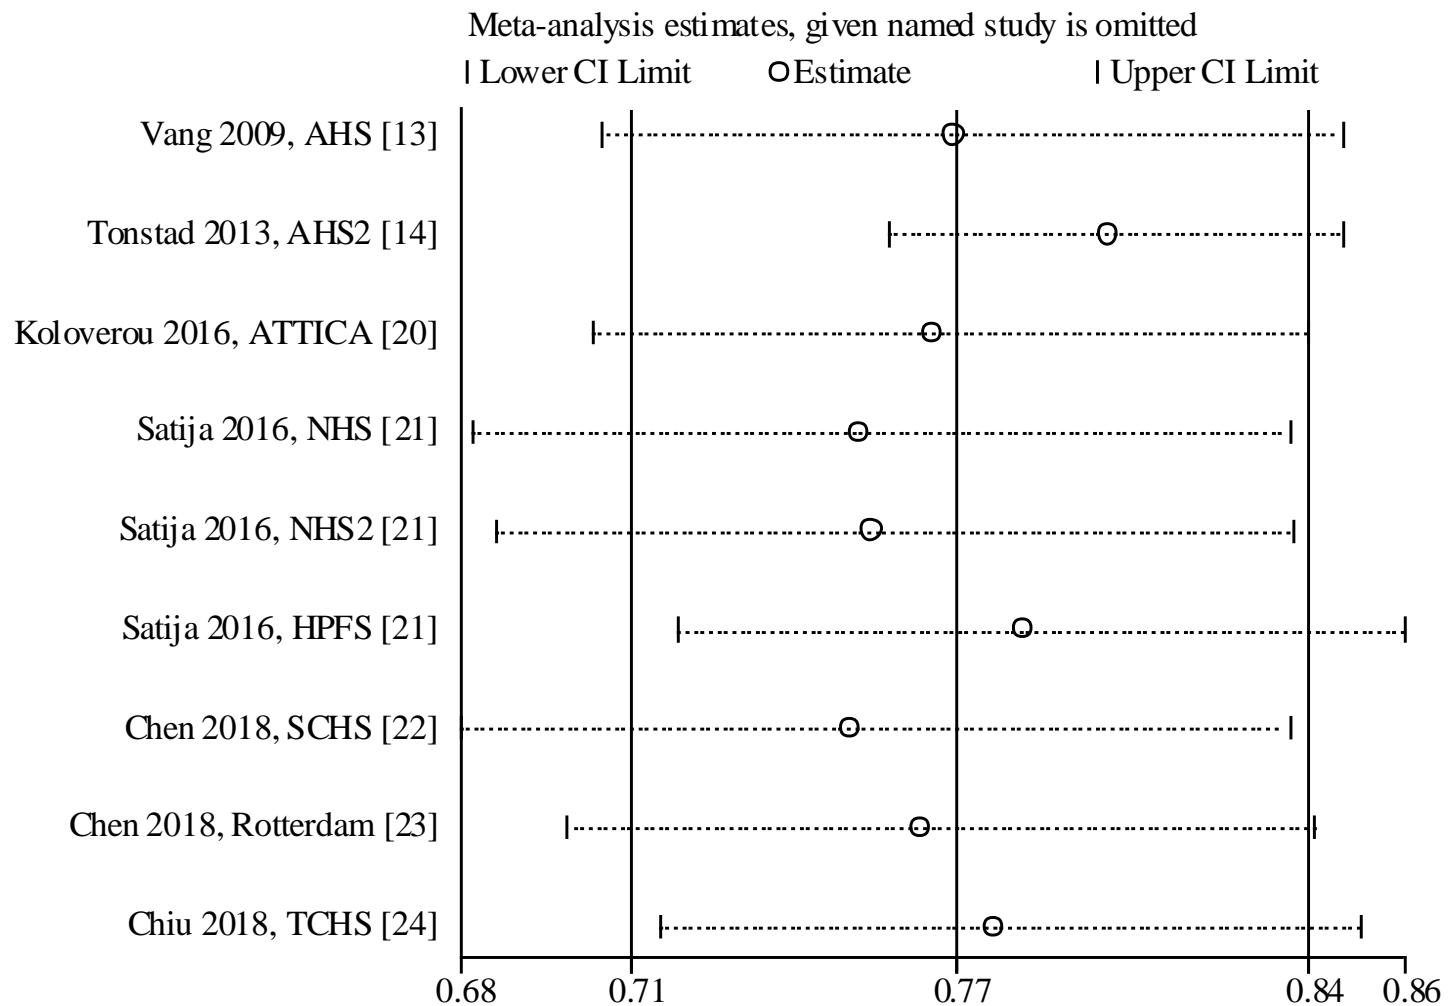

**eFigure 2.** Changes to the Overall Association Between Plant-Based Dietary Patterns and Risk of Type 2 Diabetes When Removing One Study at a time, Calculated Using Random-Effects Meta-Analysis

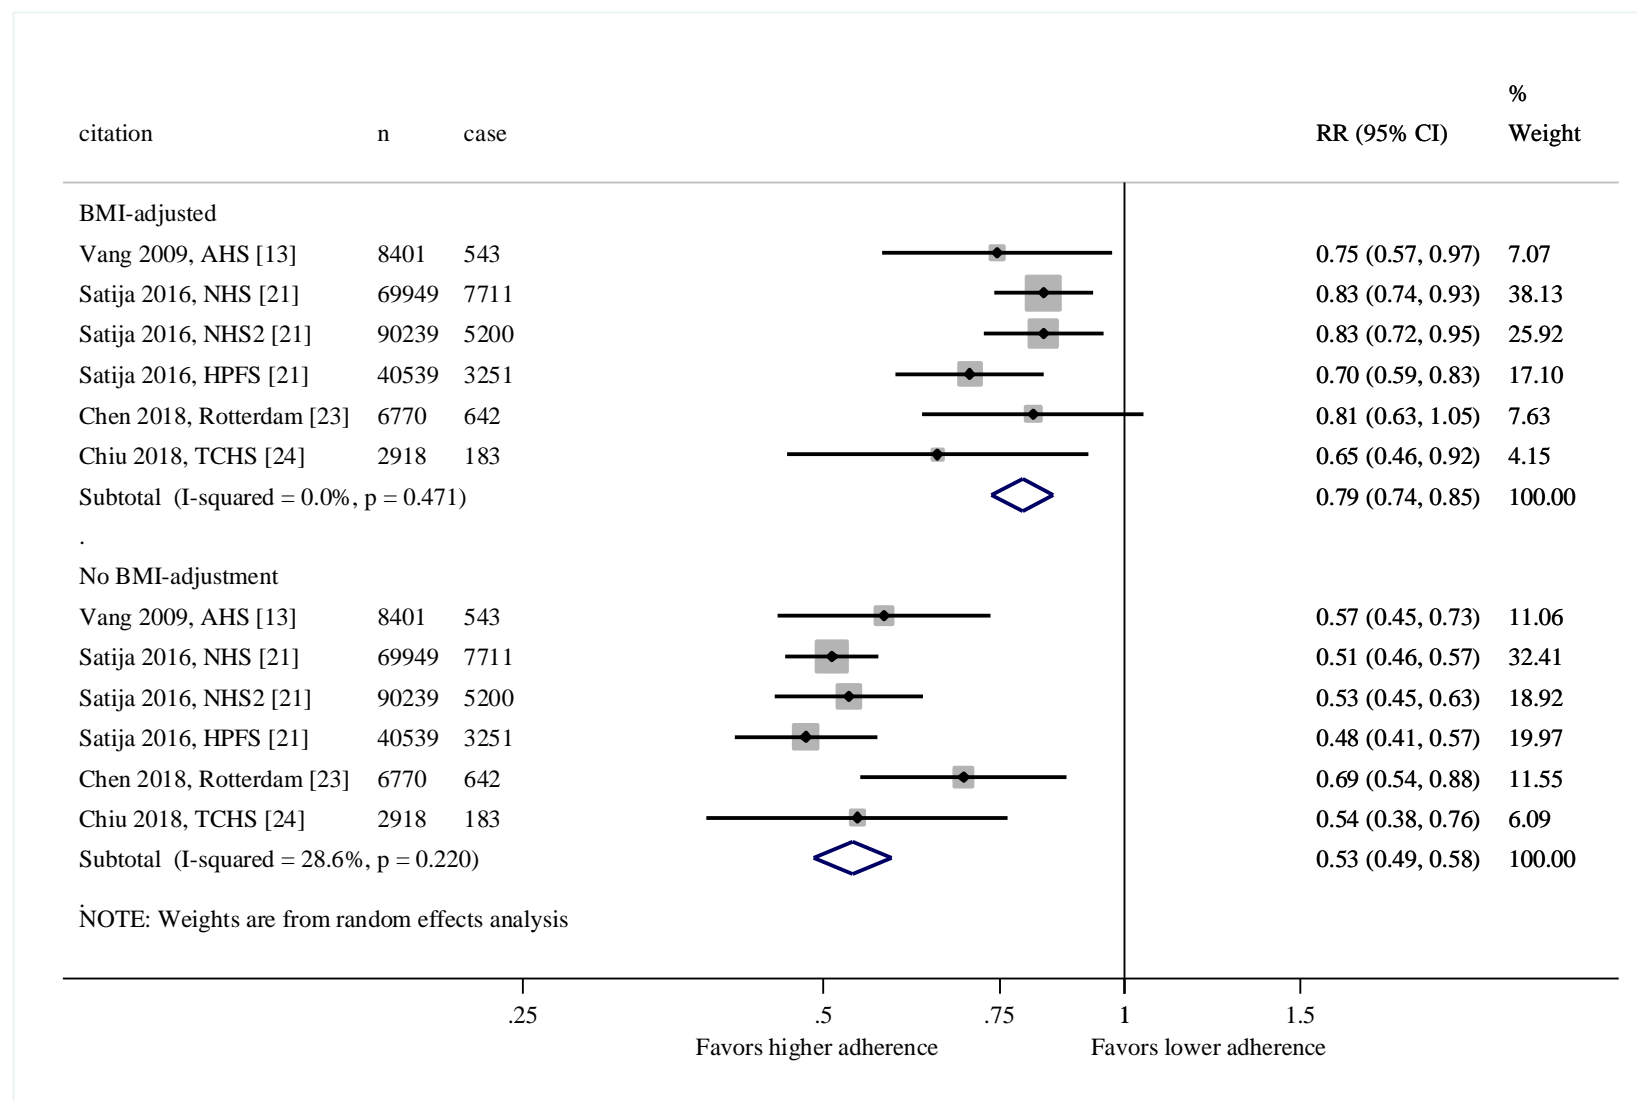

**eFigure 3.** Forest Plot of Prospective Studies Examining the Association Between Plant-Based Dietary Patterns and Risk of Type 2 Diabetes, With and Without Adjustments for Body Mass Index (BMI)  
Calculated using random-effects meta-analysis.

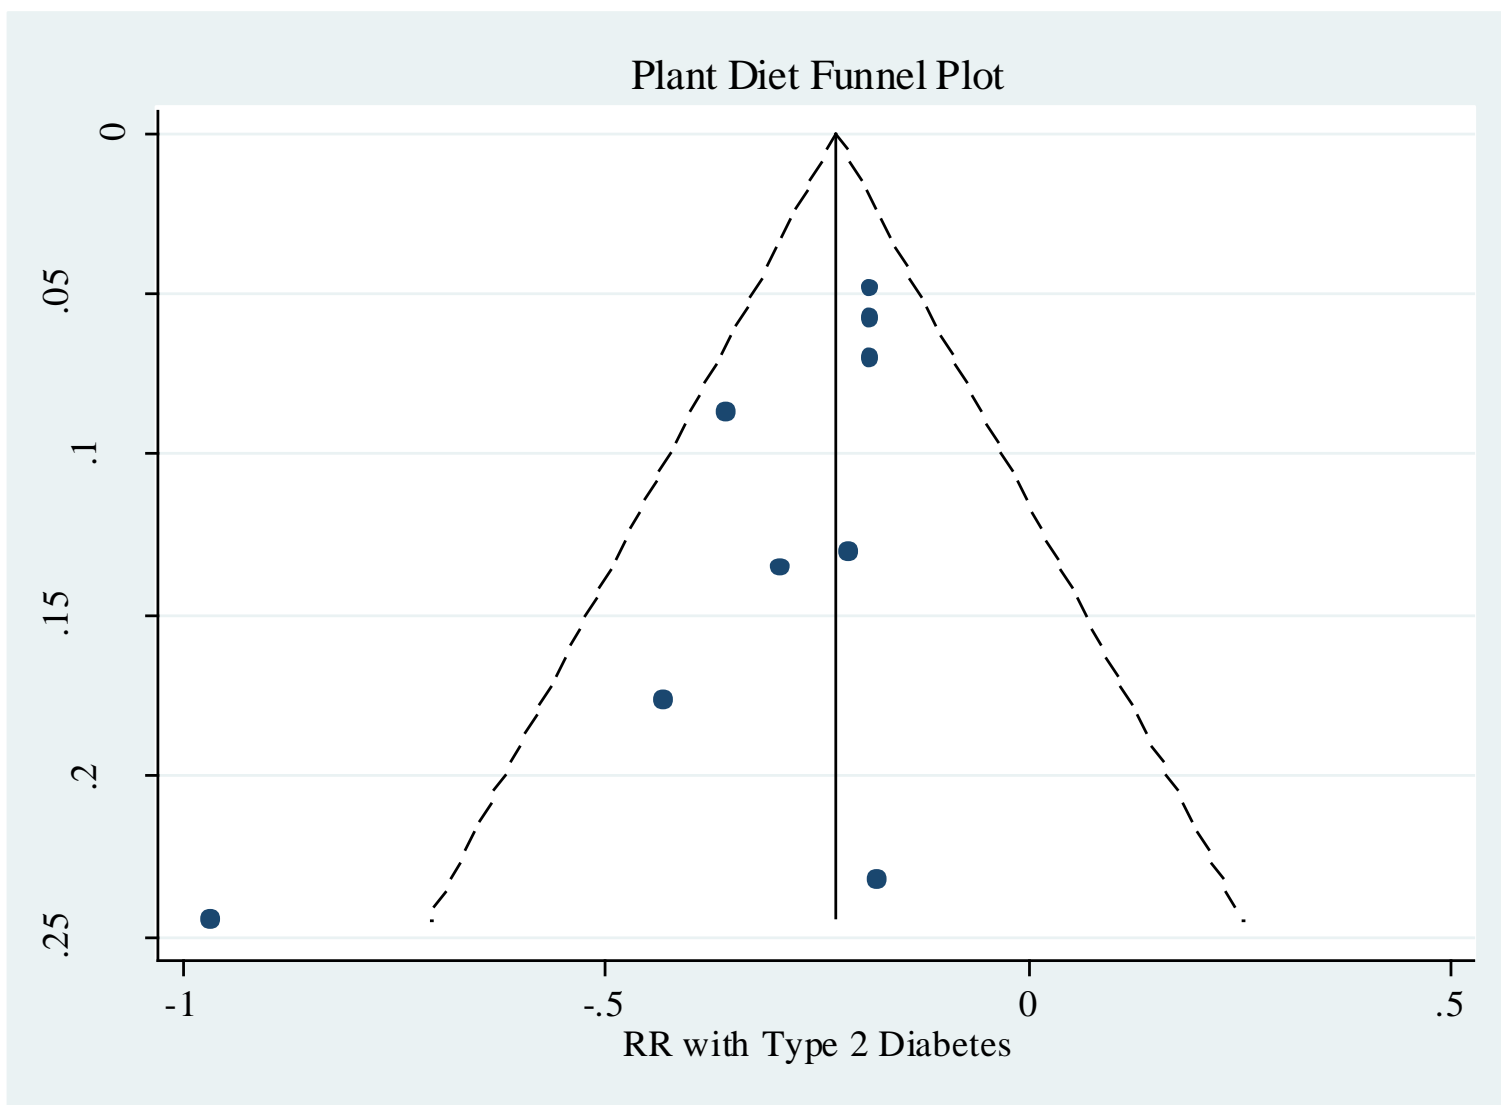

**eFigure 4.** Funnel Plot of Prospective Studies Examining the Association Between Plant-Based Dietary Patterns and Risk of Type 2 Diabetes

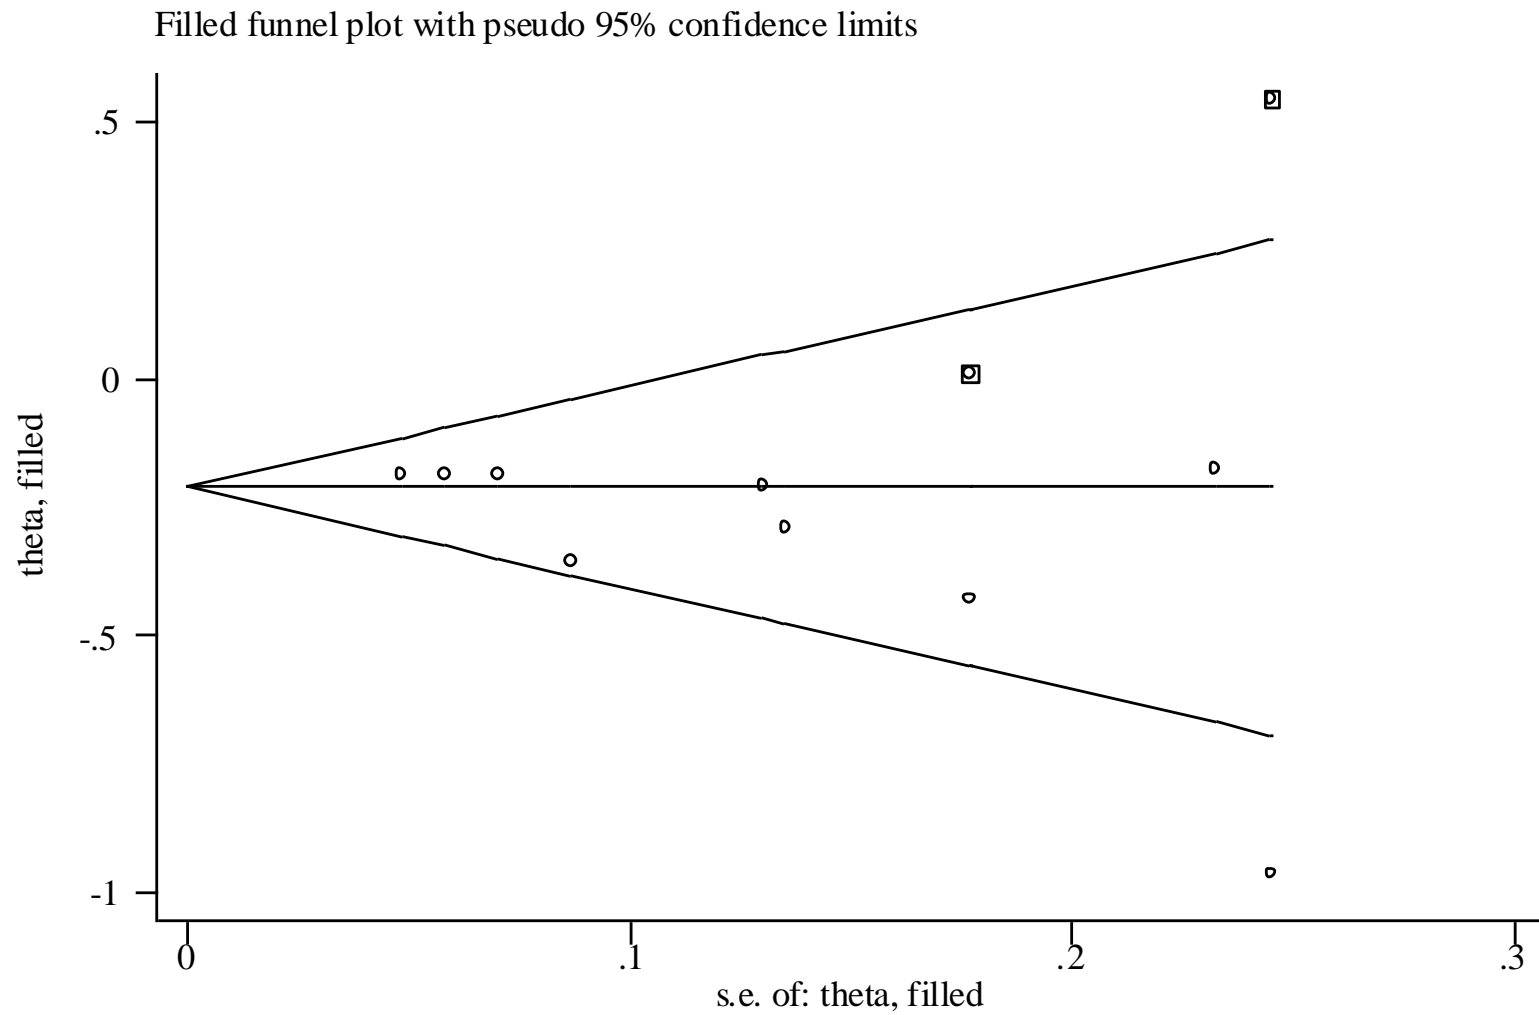

**eFigure 5.** Fill and Trim Analysis to Account for Potential Publication Bias

Funnel plot was updated with two additional studies (circles with squares around them) that was filled in by the *metatrim* module in Stata.
